# Supplementary material for: Dehydroepiandrosterone Cocrystals with Improved Solubility and Bioavailability
Source: MDPI journal article supplement (doi:10.3390/pharmaceutics14112478), 2022-11-16
Supplement: s1 [file s1]

# **Dehydroepiandrosterone Cocrystals with Improved Solubility and Bioavailability**

*Yihua Jiang,<sup>1,2</sup> Yinxiang Cheng<sup>1,2</sup>, Mengyuan Xia<sup>1,2</sup>, Bingrui Zhang<sup>1,2</sup>,*

*Qiaoce Ding<sup>1</sup>, Liye Lu,<sup>1</sup> Jian-Rong Wang<sup>1,\*</sup> and Xuefeng Mei<sup>1,2,\*</sup>*

*<sup>1</sup>Pharmaceutical Analytical & Solid-State Chemistry Research Center, Shanghai  
Institute of Materia Medica, Chinese Academy of Sciences, Shanghai 201203, China*

*<sup>2</sup>University of Chinese Academy of Sciences, No. 19A Yuquan Road,  
Beijing 100049, China*

*Correspondence: jrwang@simm.ac.cn (J.-R.W.); xuefengmei@simm.ac.cn (X.M.)*

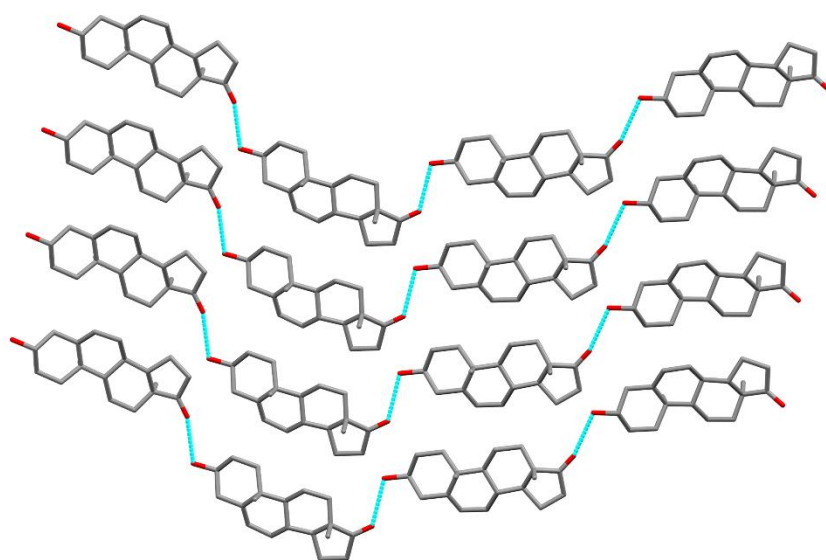

Figure S1. Crystal packing mode of DHEA.

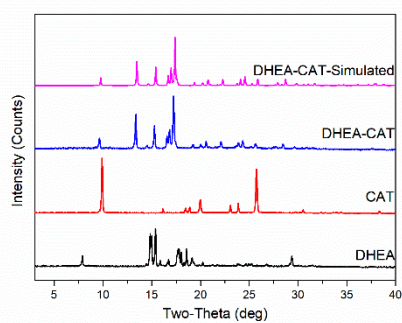

(a)

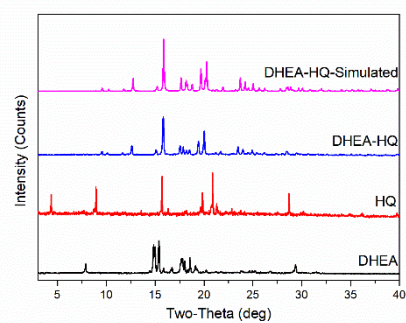

(b)

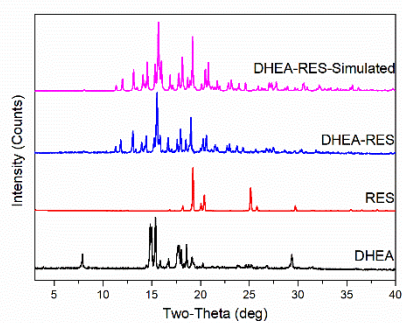

(c)

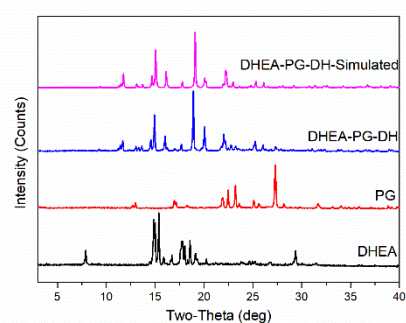

(d)

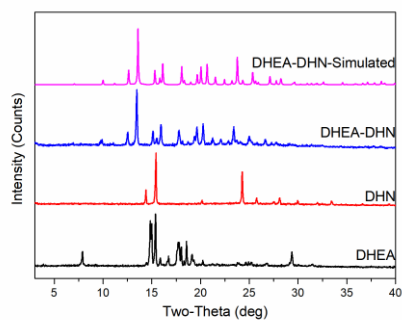

(e)

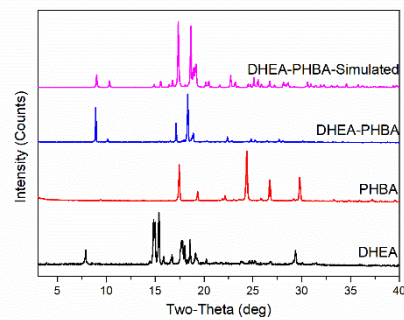

(f)

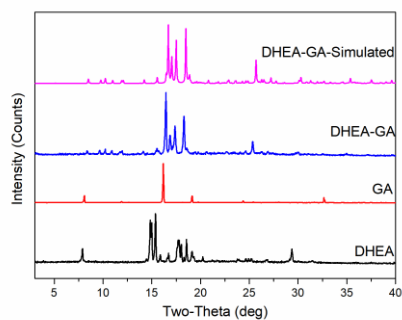

(g)

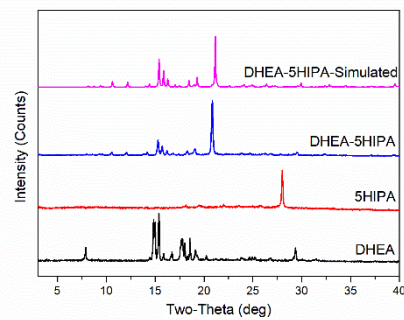

(h)

Figure S2. Comparison between experimental and simulated PXRD patterns of DHEA cocrystals: (a) DHEA-CAT, (b) DHEA-HQ, (c) DHEA-RES, (d) DHEA-PG-DH, (e) DHEA-DHN, (f) DHEA-PHBA, (g) DHEA-GA, and (h) DHEA-5HIPA.

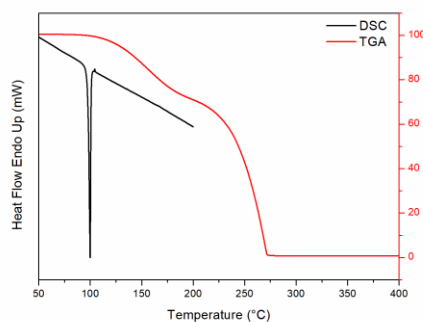

(a)

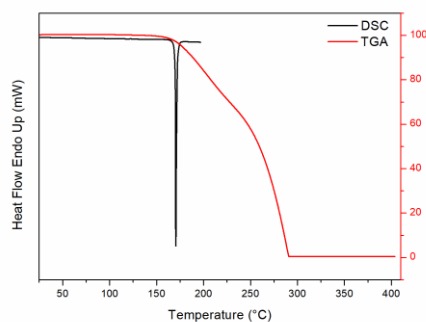

(b)

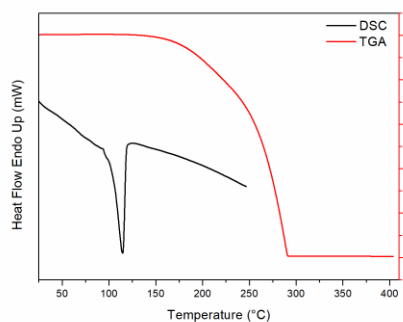

(c)

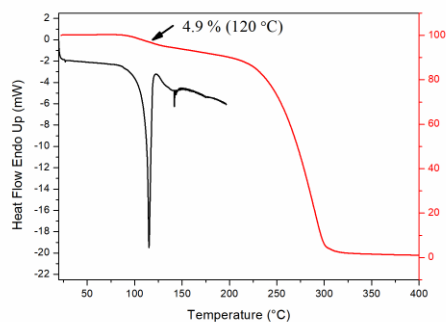

(d)

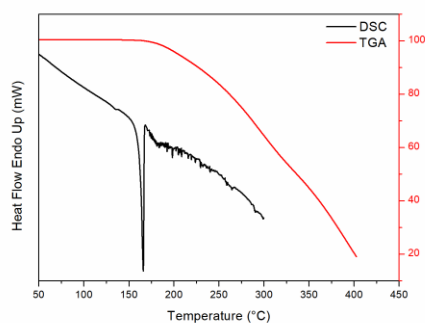

(e)

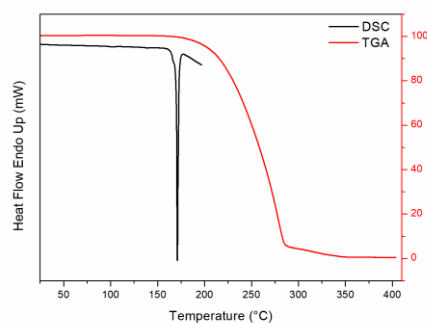

(f)

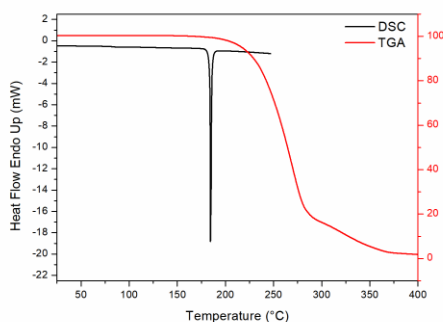

(g)

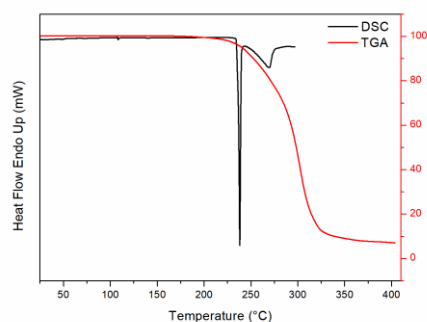

(h)

Figure S3. DSC (blue line) and TGA (red line) curves of (a) DHEA-CAT, (b) DHEA-HQ, (c) DHEA-RES, (d) DHEA-PG-DH, (e) DHEA-DHN, (f) DHEA-PHBA, (g) DHEA-GA, and (h) DHEA-5HIPA.

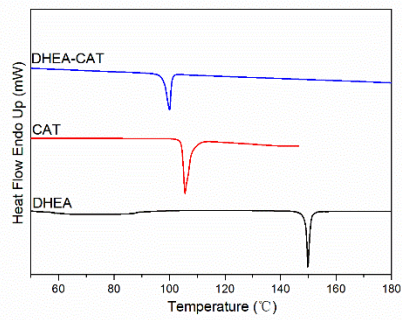

(a)

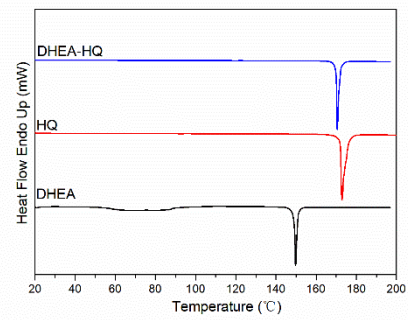

(b)

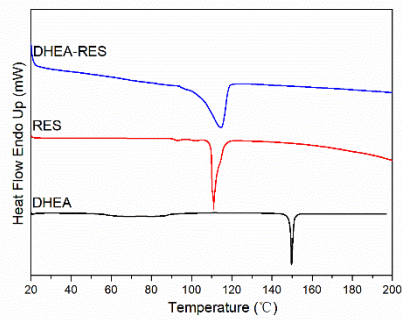

(c)

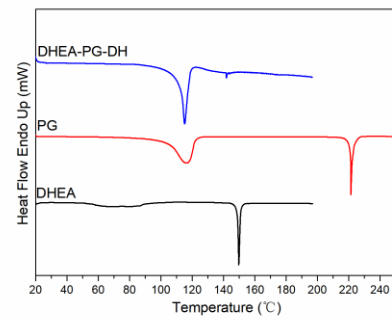

(d)

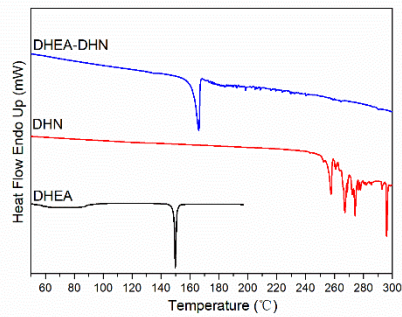

(e)

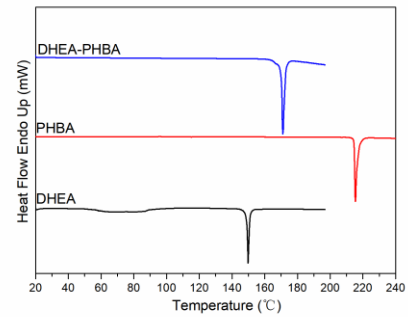

(f)

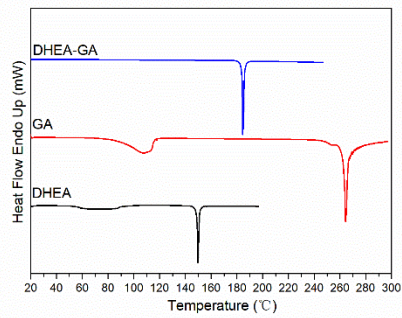

(g)

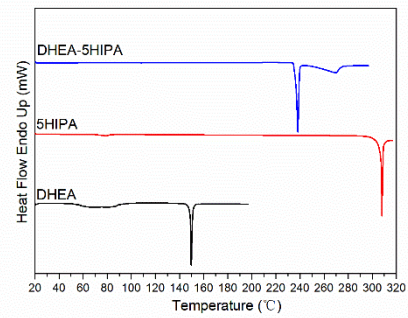

(h)

Figure S4. Comparison of DSC diagrams among DHEA, cofomers and corresponding cocrystals: (a) DHEA-CAT, (b) DHEA-HQ, (c) DHEA-RES, (d) DHEA-PG-DH, (e) DHEA-DHN, (f) DHEA-PHBA, (g) DHEA-GA, and (h) DHEA-5HIPA.

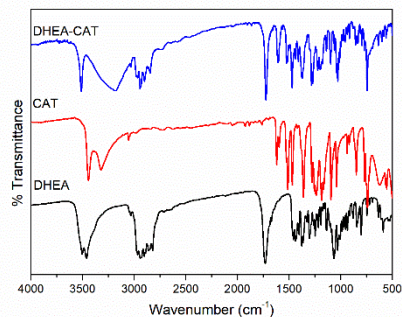

(a)

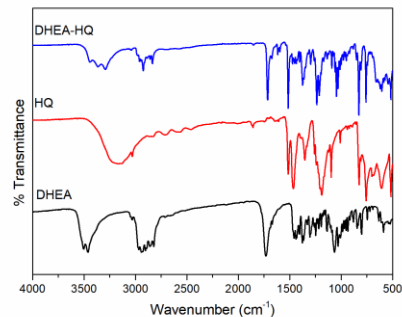

(b)

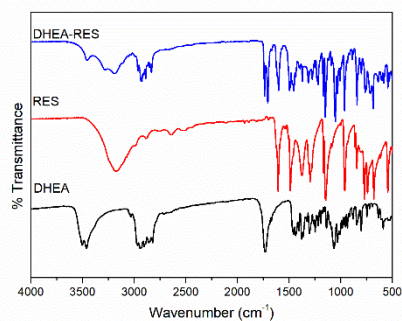

(c)

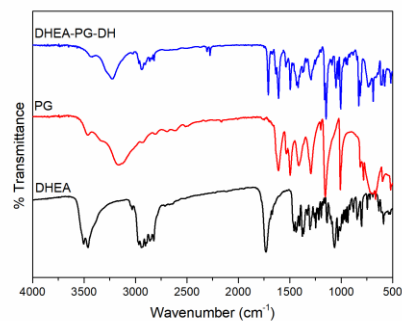

(d)

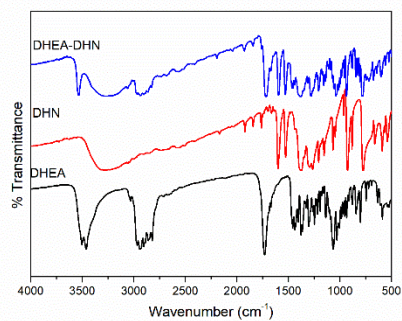

(e)

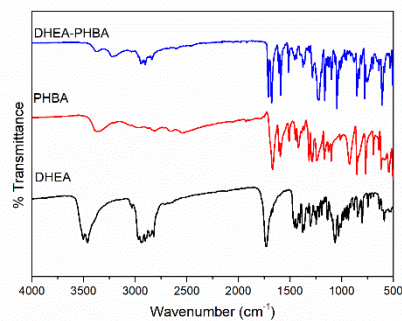

(f)



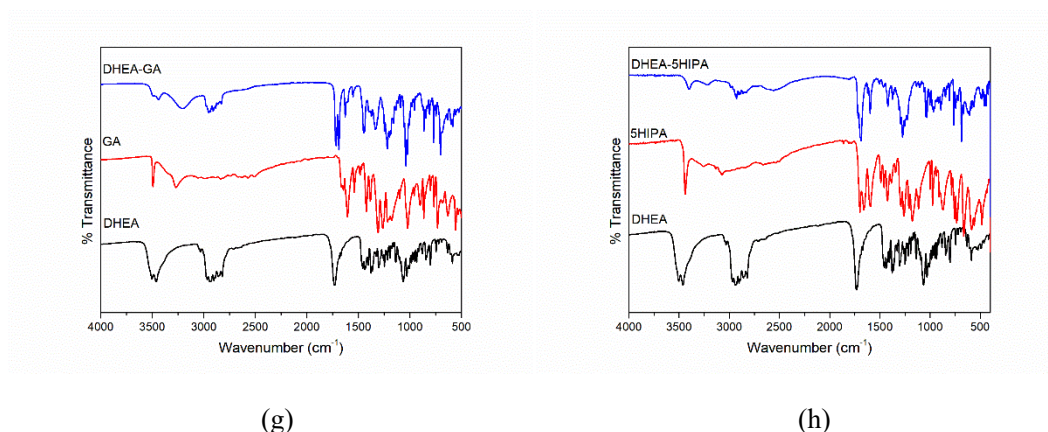

Figure S5. FT-IR spectra of DHEA, coformers and corresponding cocrystals: (a) DHEA-CAT, (b) DHEA-HQ, (c) DHEA-RES, (d) DHEA-PG-DH, (e) DHEA-DHN, (f) DHEA-PHBA, (g) DHEA-GA, and (h) DHEA-5HIPA.

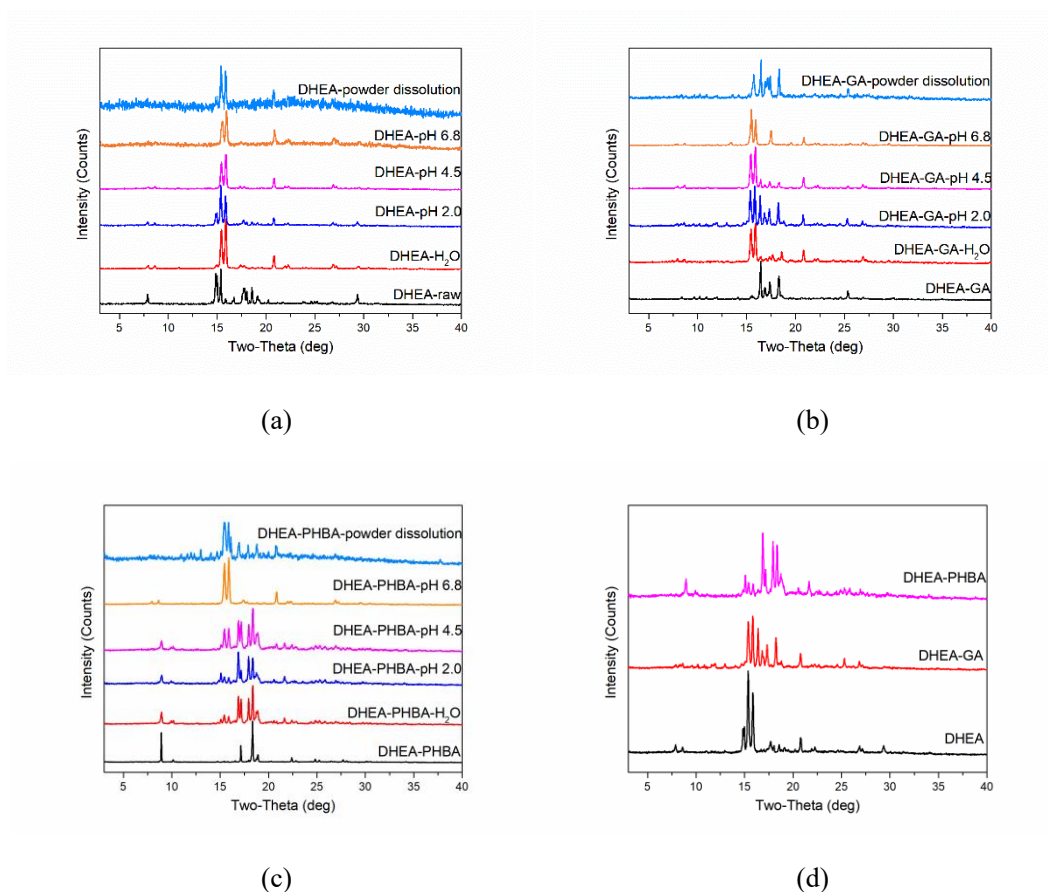

Figure S6. PXRD pattern for the resulting materials of (a) DHEA, (b) DHEA-GA, and (c) DHEA-PHBA after solubility and powder dissolution experiments, and (d): comparison of PXRD patterns among the resulting materials of DHEA, DHEA-GA and DHEA-PHBA after solubility test.

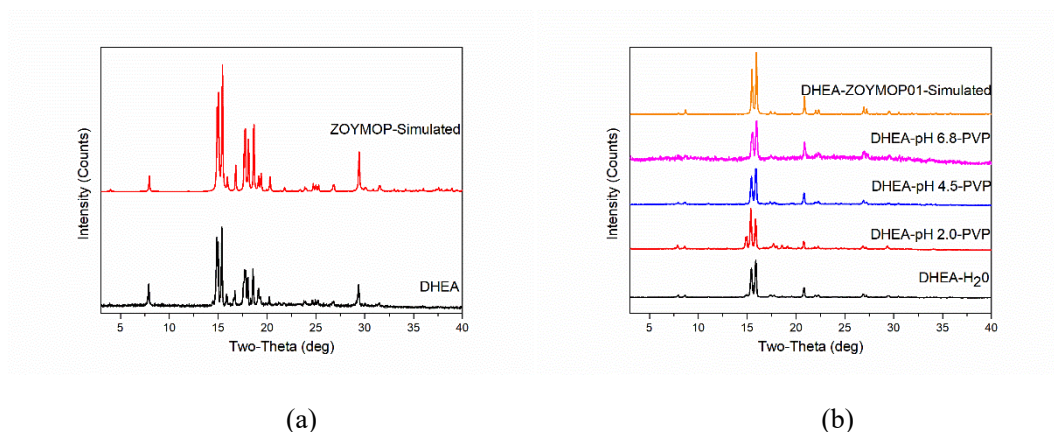

Figure S7. (a) Comparison between experimental and simulated PXRD patterns of DHEA and DHEA Form I (ZOYMOP), and (b) comparison between simulated PXRD patterns of reported DHEA Form II (ZOYMOP01) and that of DHEA after different experiments.

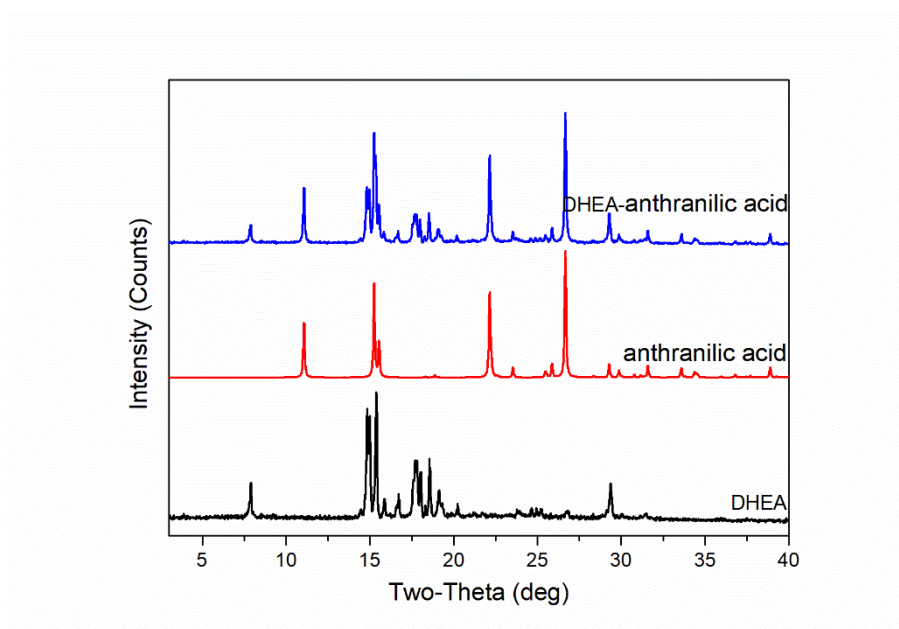

Figure S8. PXRD patterns of DHEA, anthranilic acid, and physical mixture after grinding.

Table S1. Coformers selected in DHEA cocrystal screening experiment.

| NO. | Coformer                         | NO. | Coformer                    |
|-----|----------------------------------|-----|-----------------------------|
| 1   | <b>Gallic acid</b>               | 16  | Methylparaben               |
| 2   | <b>p-hydroxybenzoic acid</b>     | 17  | 3,5-dihydroxybenzoate       |
| 3   | <b>Hydroquinone</b>              | 18  | Trimesic acid               |
| 4   | <b>Pyrocatechol</b>              | 19  | 2-Naphthol                  |
| 5   | <b>Resorcinol</b>                | 20  | 1-hydroxy-2-naphthonic acid |
| 6   | <b>1, 5-dihydroxynaphthalene</b> | 21  | 5-Nitroisophthalic acid     |
| 7   | <b>5-Hydroxyisophthalic acid</b> | 22  | 4-Hydroxy-cinnamic acid     |
| 8   | <b>Phloroglucinol</b>            | 23  | 3-hydroxy-benzoic acid      |



|    |                              |    |                             |
|----|------------------------------|----|-----------------------------|
| 9  | Anthranilic acid             | 24 | Vanillic acid               |
| 10 | p-Phenylenediamine           | 25 | Phthalic acid               |
| 11 | p-Aminobenzoic acid          | 26 | Propyl gallate              |
| 12 | p-Aminophenol                | 27 | Terephthalic acid           |
| 13 | o-Phenylenediamine           | 28 | 1-Naphthoic acid            |
| 14 | 5-Aminoisophthalic acid      | 29 | Isophthalic acid            |
| 15 | Methyl-3,5-dihydroxybenzoate | 30 | 2-hydroxy-3-naphthonic acid |

Table S2. Crystallographic data and structure refinement parameters for new forms of DHEA.

|                                              | DHEA-CAT                                              | DHEA-HQ                                               | DHEA-RES                                              | DHEA-PG-DH                                     |
|----------------------------------------------|-------------------------------------------------------|-------------------------------------------------------|-------------------------------------------------------|------------------------------------------------|
| Formula                                      | C <sub>25</sub> H <sub>34</sub> O <sub>4</sub>        | C <sub>25</sub> H <sub>34</sub> O <sub>4</sub>        | C <sub>44</sub> H <sub>62</sub> O <sub>6</sub>        | C <sub>44</sub> H <sub>66</sub> O <sub>9</sub> |
| Crystal system                               | Orthorhombic                                          | Orthorhombic                                          | Orthorhombic                                          | Monoclinic                                     |
| Space group                                  | <i>P</i> 2 <sub>1</sub> 2 <sub>1</sub> 2 <sub>1</sub> | <i>P</i> 2 <sub>1</sub> 2 <sub>1</sub> 2 <sub>1</sub> | <i>P</i> 2 <sub>1</sub> 2 <sub>1</sub> 2 <sub>1</sub> | <i>P</i> 2 <sub>1</sub>                        |
| Temperature(K)                               | 170(2)                                                | 170(2)                                                | 170(2)                                                | 150(2)                                         |
| <i>a</i> (Å)                                 | 6.3885(8)                                             | 9.7609(9)                                             | 6.5181(8)                                             | 7.8417(3)                                      |
| <i>b</i> (Å)                                 | 18.080(2)                                             | 11.7034(11)                                           | 23.171(3)                                             | 26.5046(13)                                    |
| <i>c</i> (Å)                                 | 19.087(3)                                             | 18.4429(19)                                           | 24.813(3)                                             | 9.4339(4)                                      |
| <i>α</i> (deg)                               | 90                                                    | 90                                                    | 90                                                    | 90                                             |
| <i>β</i> (deg)                               | 90                                                    | 90                                                    | 90                                                    | 90.150(6)                                      |
| <i>γ</i> (deg)                               | 90                                                    | 90                                                    | 90                                                    | 90                                             |
| <i>V</i> (Å <sup>3</sup> )                   | 2204.6(5)                                             | 2106.8(4)                                             | 3747.5(8)                                             | 1960.75(15)                                    |
| <i>D</i> <sub>Cal</sub> (g/cm <sup>3</sup> ) | 1.201                                                 | 1.256                                                 | 1.218                                                 | 1.252                                          |
| <i>Z</i>                                     | 4                                                     | 4                                                     | 4                                                     | 2                                              |
| <i>λ</i> (Mo Kα)                             | 0.7107                                                | 0.7107                                                | 0.7107                                                | 0.7107                                         |
| Independent reflections                      | 4402                                                  | 4312                                                  | 7653                                                  | 7240                                           |
| GOF                                          | 1.031                                                 | 1.043                                                 | 1.075                                                 | 1.130                                          |

|                                       |                                                       |                                                |                                                |                                                |
|---------------------------------------|-------------------------------------------------------|------------------------------------------------|------------------------------------------------|------------------------------------------------|
| R <sub>int</sub>                      | 0.0637                                                | 0.0776                                         | 0.0832                                         | 0.0773                                         |
| R <sub>1</sub>                        | 0.0630                                                | 0.0430                                         | 0.0552                                         | 0.0775                                         |
| wR <sub>2</sub>                       | 0.1329                                                | 0.1009                                         | 0.1247                                         | 0.1921                                         |
|                                       |                                                       |                                                |                                                |                                                |
|                                       | <b>DHEA-DHN</b>                                       | <b>DHEA-PHBA</b>                               | <b>DHEA-GA</b>                                 | <b>DHEA-5HIPA</b>                              |
|                                       |                                                       |                                                |                                                |                                                |
| Formula                               | C <sub>29</sub> H <sub>36</sub> O <sub>4</sub>        | C <sub>26</sub> H <sub>34</sub> O <sub>5</sub> | C <sub>45</sub> H <sub>62</sub> O <sub>9</sub> | C <sub>27</sub> H <sub>34</sub> O <sub>7</sub> |
| Crystal system                        | Orthorhombic                                          | Monoclinic                                     | Monoclinic                                     | Triclinic                                      |
| Space group                           | <i>P</i> 2 <sub>1</sub> 2 <sub>1</sub> 2 <sub>1</sub> | <i>P</i> 2 <sub>1</sub>                        | <i>P</i> 2 <sub>1</sub>                        | <i>P</i> <sub>1</sub>                          |
| Temperature(K)                        | 170(2)                                                | 170(2)                                         | 150(2)                                         | 170(2)                                         |
| <i>a</i> (Å)                          | 7.6269(5)                                             | 5.9728(4)                                      | 10.7510(4)                                     | 10.9892(15)                                    |
| <i>b</i> (Å)                          | 17.6512(15)                                           | 19.6177(13)                                    | 10.6906(4)                                     | 11.4290(14)                                    |
| <i>c</i> (Å)                          | 17.6980(13)                                           | 9.5547(6)                                      | 17.8607(6)                                     | 11.4576(15)                                    |
| <i>α</i> (deg)                        | 90                                                    | 90                                             | 90                                             | 79.554(4)                                      |
| <i>β</i> (deg)                        | 90                                                    | 95.737(2)                                      | 104.8110(10)                                   | 71.335(4)                                      |
| <i>γ</i> (deg)                        | 90                                                    | 90                                             | 90                                             | 62.457(3)                                      |
| <i>V</i> (Å <sup>3</sup> )            | 2382.6(3)                                             | 1113.94(13)                                    | 1969.57(12)                                    | 1207.9(3)                                      |
| D <sub>Cal</sub> (g/cm <sup>3</sup> ) | 1.251                                                 | 1.272                                          | 1.259                                          | 1.294                                          |
| <i>Z</i>                              | 4                                                     | 2                                              | 2                                              | 2                                              |
| <i>λ</i> (Mo Kα)                      | 0.7107                                                | 0.7107                                         | 0.7107                                         | 0.7107                                         |
| Independent reflections               | 4834                                                  | 4544                                           | 7973                                           | 8014                                           |
| GOF                                   | 1.076                                                 | 1.073                                          | 1.054                                          | 1.060                                          |
| R <sub>int</sub>                      | 0.0534                                                | 0.0718                                         | 0.0496                                         | 0.0673                                         |
| R <sub>1</sub>                        | 0.0457                                                | 0.0547                                         | 0.0441                                         | 0.0715                                         |

wR<sub>2</sub>

0.1002

0.1111

0.1038

0.1827

\*the Z number represents the cocrystal formula in a unit cell

Table S3. List of H-bond lengths and angles for DHEA and DHEA cocrystals.

| Form              | interaction   | D-H/Å   | H...A/ Å | D...A/ Å | ∠D-H...A/ Å | symmetry code      |
|-------------------|---------------|---------|----------|----------|-------------|--------------------|
| <b>DHEA-CAT</b>   | O3-H3A...O2   | 0.85    | 1.93(6)  | 2.726(6) | 155         | -1/2+x, 1/2-y, -z  |
|                   | O4-H4...O1    | 0.84    | 1.86(6)  | 2.692(6) | 166         | 1/2-x, 1-y, -1/2+z |
| <b>DHEA-HQ</b>    | O1-H1...O4    | 0.84(4) | 2.05(4)  | 2.882(3) | 175         | 1-x, 1/2+y, 3/2-z  |
|                   | O4-H4...O2    | 0.84    | 2.00     | 2.833(3) | 175         | x, y, 1+z          |
| <b>DHEA-RES</b>   | O1-H1...O3    | 0.92(3) | 1.95(3)  | 2.859(4) | 171         | -x, 1/2+y, 3/2-z   |
|                   | O3-H3A...O5   | 0.94(4) | 1.94(4)  | 2.858(4) | 167         | 1-x, -1/2+y, 3/2-z |
| <b>DHEA-PG</b>    | O1-H1...O2    | 0.84    | 2.49     | 3.001(7) | 120         | 1-x, 1/2+y, 2-z    |
|                   | O6-H6A...O3   | 0.84    | 1.96     | 2.755(7) | 159         | 1+x, y, z          |
|                   | O6-H6A...O4   | 0.84    | 2.56     | 2.943(7) | 109         | 1-x, -1/2+y, 1-z   |
|                   | O8-H8A...O3   | 0.87    | 2.12     | 2.905(7) | 150         | 1+x, y, z          |
|                   | O8-H8B...O2   | 0.87    | 2.13     | 2.950(7) | 157         | 1-x, 1/2+y, 2-z    |
|                   | O9-H9A...O8   | 0.87    | 1.95     | 2.781(9) | 160         | -1+x, y, -1+z      |
|                   | O9-H9B...O6   | 0.87    | 1.99     | 2.850(7) | 167         | -1+x, y, z         |
| <b>DHEA-DHN</b>   | O4-H4...O1    | 0.90(4) | 1.85(4)  | 2.739(3) | 169         | 1+x, -1+y, z       |
| <b>DHEA-PHBA</b>  | O1-H1...O3    | 0.92(7) | 2.02(7)  | 2.893(5) | 157         | -1+x, y, z         |
|                   | O5-H5...O2    | 0.84    | 1.91     | 2.731(4) | 164         | x, 1+y, z          |
| <b>DHEA-GA</b>    | O1-H1...O5    | 0.84    | 1.97     | 2.764(3) | 158         | x, y, -1+z         |
|                   | O3-H3...O8    | 0.81(5) | 2.28(5)  | 2.984(3) | 147         | -1+x, y, z         |
|                   | O7-H7...O4    | 0.84    | 1.92     | 2.721(3) | 159         | 1+x, y, 1+z        |
|                   | O8-H8A...O1   | 0.84    | 1.99     | 2.726(3) | 146         | 1+x, y, 1+z        |
| <b>DHEA-SHIPA</b> | O1-H1...O11   | 0.84    | 1.90     | 2.731(4) | 170         | x, -1+y, z         |
|                   | O3-H3A...O7   | 0.85    | 1.86     | 2.701(4) | 167         | 1+x, y, z          |
|                   | O6-H6A...O12  | 0.91    | 1.71     | 2.602(4) | 168         | -1+x, y, z         |
|                   | O8-H8A...O1   | 0.86    | 1.74     | 2.597(5) | 170         | x, y, 1+z          |
|                   | O9-H9A...O4   | 0.84    | 1.93     | 2.766(5) | 171         | -1+x, 1+y, 1+z     |
|                   | O10-H10...O3  | 0.85    | 1.71     | 2.548(4) | 165         | -1+x, 1+y, -1+z    |
|                   | O13-H13...O5  | 0.88    | 1.71     | 2.587(4) | 179         | 1+x, y, z          |
|                   | O14-H14A...O2 | 0.84    | 1.92     | 2.753(5) | 171         | x, y, -1+z         |

Table S4. Specific melting points and fusion enthalpies of DHEA, cofomers and DHEA cocrystals.

| Compound | Melting point<br>(°C) | Fusion enthalpy<br>(J/g) | Compound   | Melting point<br>(°C) | Fusion enthalpy<br>(J/g) |
|----------|-----------------------|--------------------------|------------|-----------------------|--------------------------|
| DHEA     | 149.34                | 84.68±10.00              | DHEA-CAT   | 101.90                | 78.86±10.00              |
| CAT      | 172.60                | 174.90±20.00             | DHEA-HQ    | 170.10                | 128.2±15.00              |
| HQ       | 172.24                | 254.10±35.00             | DHEA-RES   | 118.48                | 52.61±10.00              |
| RES      | 109.86                | 401.77±60.00             | DHEA-PG-DH | 112.51                | 125.8±20.00              |

|       |        |              |            |        |              |
|-------|--------|--------------|------------|--------|--------------|
| PG    | 104.44 | 554.30±60.00 | DHEA-DHN   | 168.25 | 93.88±10.00  |
| DHN   | 260.77 | 89.57±15.00  | DHEA-PHBA  | 170.2  | 112.0±15.00  |
| PHBA  | 214.67 | 231.0±20.00  | DHEA-GA    | 184.22 | 110.22±15.00 |
| GA    | 263.62 | 403.1±60.00  | DHEA-5HIPA | 236.59 | 90.63±10.00  |
| 5HIPA | 307.74 | 240.4±30.00  |            |        |              |

Table S5. Characteristic absorption band of C=O stretching vibration on DHEA

| Compound   | Wavenumbers (cm <sup>-1</sup> ) |
|------------|---------------------------------|
| DHEA       | 1731.00                         |
| DHEA-CAT   | 1720.00                         |
| DHEA-HQ    | 1713.28                         |
| DHEA-RES   | 1704.73                         |
| DHEA-PG-DH | 1707.65                         |
| DHEA-DHN   | 1716.09                         |
| DHEA-PHBA  | 1709.18                         |
| DHEA-GA    | 1716.82                         |
| DHEA-5HIPA | 1715.56                         |

Table S6. Proportion of H-O/O-H interaction among multiple solid forms.

| Compound   | Proportion of H-O/O-H interactions |
|------------|------------------------------------|
| DHEA       | 16.4 %                             |
| DHEA-CAT   | 16.4 %                             |
| DHEA-HQ    | 18.9 %                             |
| DHEA-RES   | 19.1 %                             |
| DHEA-PG-DH | 15.3 %                             |
| DHEA-DHN   | 15.0 %                             |
| DHEA-PHBA  | 23.5 %                             |
| DHEA-GA    | 28.2 %                             |
| DHEA-5HIPA | 1715.56                            |
